# Supplementary material
Source: PubMed Central journal article supplement (PMC4777836)
Supplement: supp_M115.706440_SiMat-Supplement_JBC_R1rev.pdf [file supp_M115.706440_SiMat-Supplement_JBC_R1rev.pdf]

## SUPPLEMENTAL DATA

### EXPERIMENTAL PROCEDURES

*Determination of the 5'- and 3' ends of the SiMat1 mRNA by RACE-PCR.* Isolation of total mRNA using oligo-dT-functionalized magnetic beads, and synthesis of cDNA was performed as described previously (1). For amplification of the 3'-end, nested PCRs were performed using the gene-specific sense primer 5'-ATTCTCCATTGCCACCAC and the antisense primer 5'-GGCCACGCGTCGACTAGTAC(T)<sub>17</sub> for the first PCR, and the gene-specific sense primer 5'-ACCGGTGGTTTCTCCACC and the antisense primer 5'-GGCCACGCGTCGACTAGTAC for the second PCR. To amplify the 5'-end, two nested PCRs were performed using sense primer 5'-GGCCACGCGTCGACTAGTACGGGGIIGGGIIGGGIIG and the gene-specific antisense primer 5'-ATCATCTTACGGAGTCCACC and for the first PCR, and sense primer 5'-GGCCACGCGTCGACTAGTAC and gene specific antisense primer 5'-ACCAACGGTGCTGGAAGAGG for the second PCR. All PCR products were ligated into the pJet1.2 vector (Thermo Scientific) and sequenced (sequence information can be found in Fig. S6).

### FIGURES

#### rCinY2

```
1 AGGAGGTAAA ACATATGGGT ACTAACAAAA CGCTGCCACC GACCCCGTTC CCAGGCCGTC
61 CGACCCCGAA TCCGACCATG GTTAACACTA TCGGTACCCC GGGTCCGAGC TTCATTGTTA
121 CCGAACAAAC GCCGGCACCT ACGCCGGGTG ACGTGTGAC CCCGAGCCG ACCCCGCTGC
181 CTACCCTGGG TGGTGTGCCG ACGACGAAGA TGCCGACGGA AATGAGCTAT GGCTATGGTT
241 ACGGTGACTA CGGCATCGTC GACTGCTTTG GTAAGTCTGG TAAGAGCGGC AGCGGCTGTG
301 GTAAATCCGG TAAAGGCTCC AAGAGCTCTG GTAAGTCGGG TAAGTCCGGT GCGGCGGGTG
361 GCGGTGGTTA CGGCTATGGT GACAACACTG CGGATGATTA CACCCCGAGC ACCGATGACT
421 ACGAGTACGG TTACGGTCAT GGTGGTAGCT CCGGCAAGTC CGGCAAAGGC AGCAGCGGCA
481 AGAGCGGTAA GAGCTCTAGC AAAAGCTCTA AAGGTTCCGG TAAAAGCAGC AAAAGCAGCG
541 GTAAATCGTC TAAAAGCTCC GGTAAAAGCG GCAAGGGTGG TAGCCGTGAC GATGGCCACG
601 GTTATGGCGG CTACGGTGGC TATGAGGGCT ACGGCGGTTA TGAGGGTTAT CAGTACGGCG
661 GTGATGAATA TGTCCGTCGC AATCGCCGCC TGGGCGCCAG CCACAATAAC CGTATTCACC
721 ACCACCATCA TCACTAAGGA TCC
```

#### rCinW2

```
1 AGGAGGTAAA ACATATGCAA CAAAGCTCTG TCCGCGGTGT CGCAACTACT AGCTCTCGCC
61 AACTGGATGA ATGGGGTGAC GACCGGTGGG GTTCGAGCGA TAGCGGCTCT AGCGGTAAAT
121 CCGGCAAATC GGGTGGTAGC GCCAGCTCTG GCGATGGCTG GGAAACCGAC GGTGGGGCG
181 GTGATTACTC GAGCTCTAAA AGCGGTAAAA GCGGCTCCGG CAAGTCCGGC AAAGGTAGCT
241 CGGGTCCGCA CGGTCATTGG GTGTATATCG AGGACGATAG CAGCGACGGC AGCGGTAAGT
301 CGGGTAAAGG CTCGAGCTCC AAAGGTTCTA AAGGTTCCAG CAAGTCGAGC AAGGGCAGCT
361 CTAGCGATGA CAGCACGGAT GACTCCTGGG ACGGTGGCTG GGGCGGTCAC GCGGTTGGA
421 ATGGTGATAA CAGCGGCAAG TCTGGTAAAG GTTCTTATGG TAGCGGTAAG AGCGGTAAG
481 GTAGCAGCTA CCCGAGCAGC CACTGGGGTC CGAGCCATTG GGGTAGCGAC GACGACGATT
541 CGTCCTCTAG CAAAAGCTCC AAGGGTTCTA GCGAGAGCAG CTCTAAGAGC AGCAAGGGCT
601 CCAGCGACAG CAGCAGCAAA TCCAGCAAAG GTTCGTCCAG CAGCGAGGAC GAAGGCCATT
661 GGGAGTGGGA AGGCGGCTAT GGTTCCGGCA AGAGCGGCAA AGGCAGCTAC AGCGGTAGCT
721 CCGGTAAGTC CGGTAAGTCT GGCAGCGGTG ACAGCTGGGT TGGTGATTAC GGCAGCTCTG
781 GTAAATCTGG CAAGGGTAGC TATGGCGGTG ATAGCTGGGG TGGTAACTAC AATGGTTGGG
841 GTGGCCACTA CGACGTGGAC GTTGATGACG ATGATAGCAG CTCCAGCAAG AGCTCTAAGG
901 GTTCGTCTAA GAGCTCGAAA GGCAGCAGCG AAGATAGCAG CAAGTCCTCT AAGGGCTCTA
961 GCAGCAAAAAG CAGCAAAGGC TCCAGCAGCT CCGAGGACGA GGGTCACTGG GTTTGGGAAG
1021 GTAGCTACGG TAGCGGCAAA AGCGGCAAGG GTTCCTACTC CGGTAGCAGC GGCAAATCCG
1081 GTAAATCGGG TAGCGGCGAT GAGGGTTGGT ATAGCGGTTG GCATCATCAC CACCACCACT
1141 AAGGATCC
```

**FIGURE S1.** DNA sequences of codon-optimized recombinant cingulins. Translation start and stop codons are highlighted in bold letters.

**rCinY2** (240 amino acids, pI = 9.4)

1 MGTNKTLPPTPFGRPTPNPTMVNTIGTPGPSFIVTEQTPAPTTPGDVLTQPPTPLPTLGG  
61 VPTTKMPTEMSYGYGYDYGIVDCF**GKSGKSGSGCGKSGKSKSSGKSGKSGGGGGGGYG**  
121 **YGDNYADDYTPSTDDYEGYGHGSSGKSGKGSSGKSGKSSSKSSKSGKSSKSSGKSSK**  
181 **SSGKSGKGGSRDDGHGYGGYEGYEGYQYGGDEYVRRNRRI**GASHNNRIHHHHHH

**rCinW2** (375 amino acids, pI = 6.3)

1 MQQSSVRGVATTSS**SRQLDEWGDDAWGSSDSGSSGKSGKSGGSASSGDGWETDGWGGDYSS**  
61 **SKSGKSGSGKSGKGSSGPHGHVYIEDDSSDGSGKSGKSSSKGSKGSSKSSKSSSSDDS**  
121 **TDDSWDGGWGGHGGWNGDN**SGKSGKGSYSGKSGKSSSYPS**SHWGP**SHWGSDDDDSSSK****  
181 **SSKGSSESSSKSSKSSSDSSSKSSKSSSSSEDEGHWEWEGYSGKSGKGSYSGSSGKSG**  
241 **KSGSGDSWVGDYSSGKSGKGSYGGDSWGGNYNGWGGHYD**VDDDDSSSKSSKSSKS****  
301 **SKGSSEDSKSSKSSSKSSKSSSSSEDEGHVWEGSYSGKSGKGSYSGSSGKSGKSGS**  
361 **GDEGWYSGWHHHHHH**

**FIGURE S2.** Amino acid sequences of recombinant cingulins. Lysine-rich regions are shown in red with KXXX motifs highlighted in yellow. Tyrosine-rich regions are depicted in green, tryptophan rich regions in blue, and regions rich in both tryptophan and tyrosine shown in purple. RXL motifs are highlighted in black with white letters.

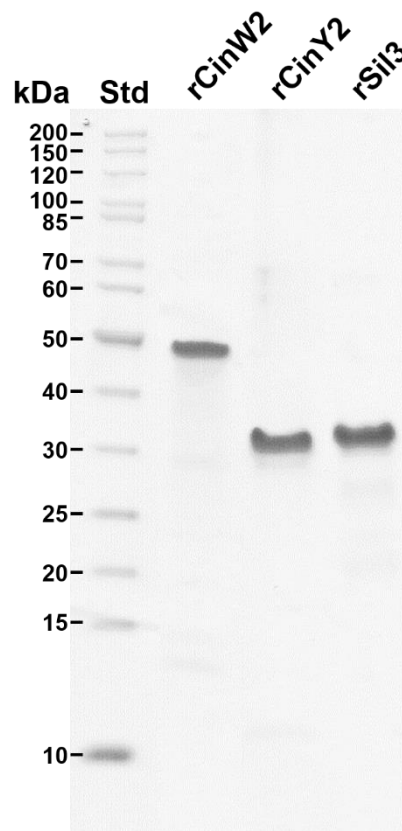

**Figure S3.** SDS-PAGE analysis of purified rCinY2, rCinW2, and rSil3. Two  $\mu$ g purified protein were loaded on each lane. The gel was stained with Coomassie Blue.

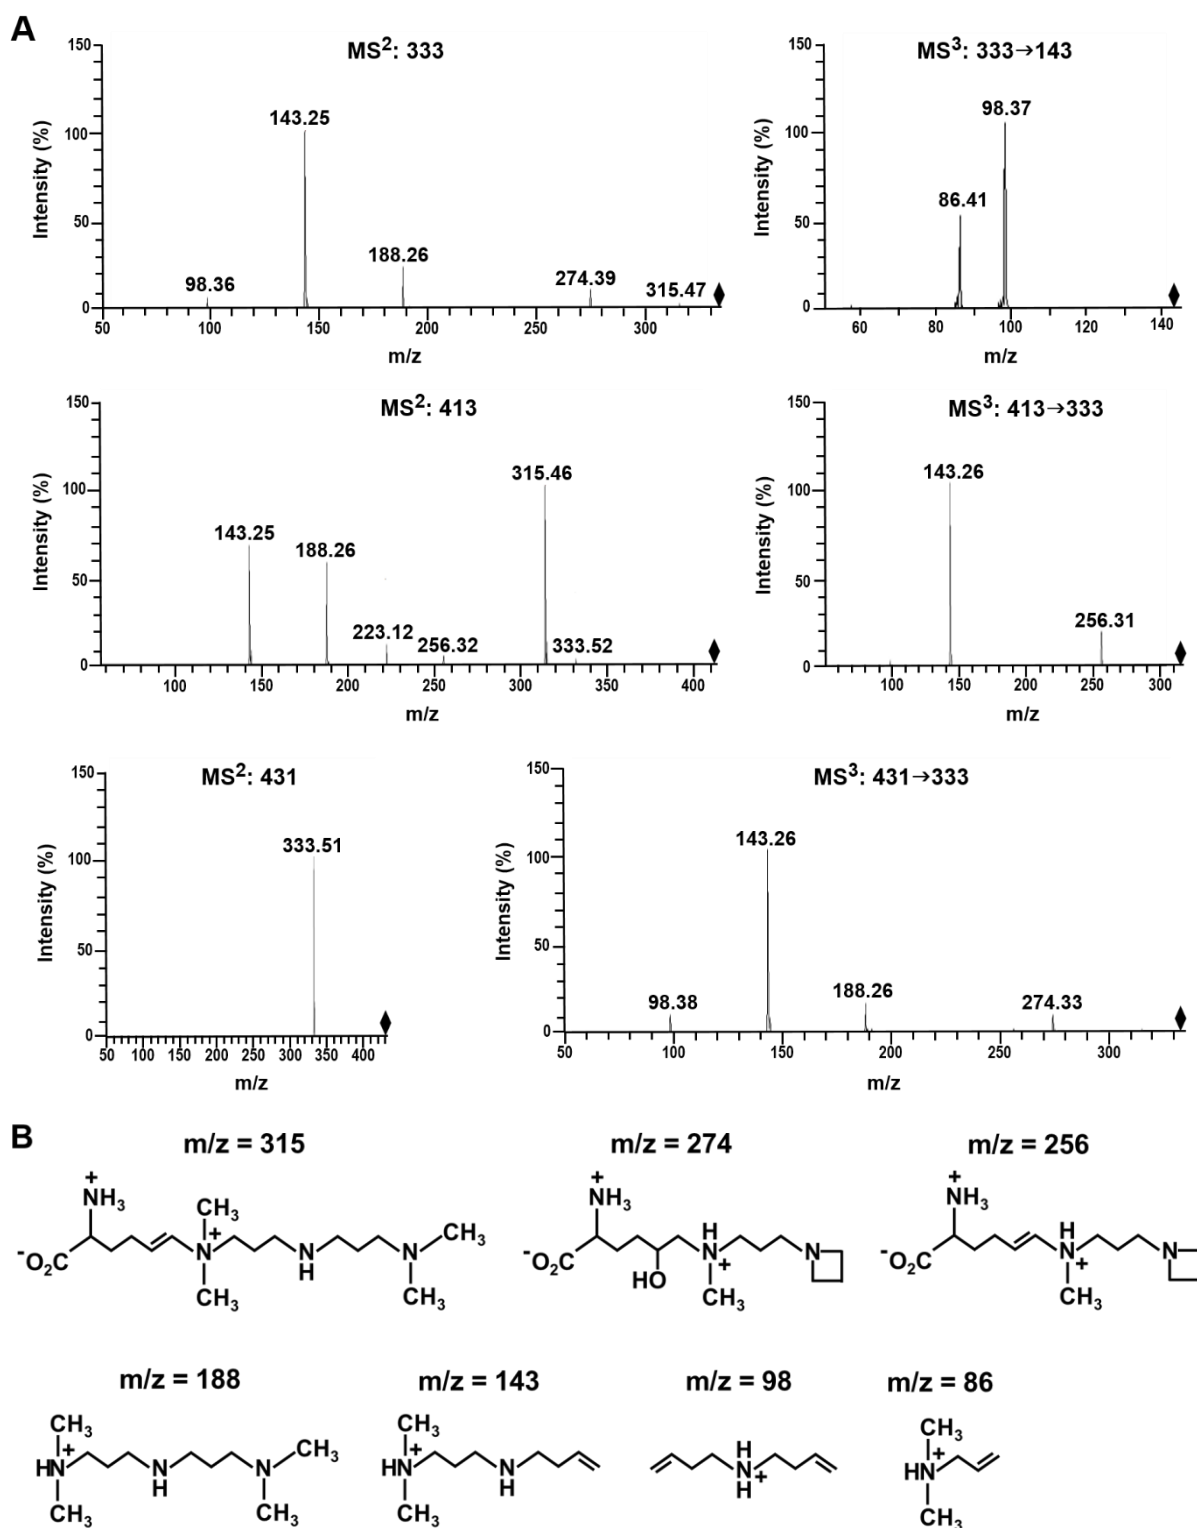

**FIGURE S4.** Mass spectrometric fragmentation analysis of lysine derivatives. *A*, MS<sup>2</sup> and MS<sup>3</sup> spectra were obtained by collision-induced fragmentation of singly charged ions with  $m/z$  ratios indicated at the top of each image. The black diamond indicates the position of the parent ion that was fragmented. *B*, predicted structures of the fragment ions from the spectra in *A*.

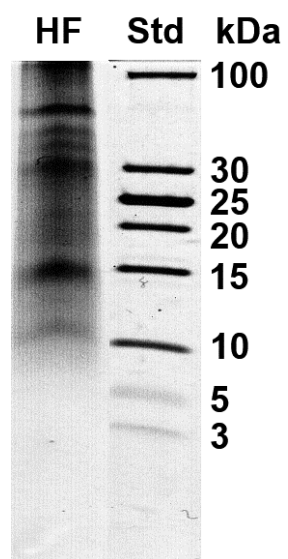

**FIGURE S5.** HF extract from the insoluble organic matrices. The HF extract was subjected to Tris-Tricine SDS-PAGE (16% acrylamide) (2) and stained with Coomassie Blue. Std = molecular mass standard.

**SiMat1** (TP-ID21094, SFLP44)

1 *MKLSKFTTVATALAAASSSTVGVSALEGGLRKMMKDG YGYTDDYGYEHGLHSSSKSGKSG*  
61 *SSKGGKSESHGYAGYSMDYVETIVEEYGGDYGYSGHSSSKGGKSGSSKSGKSSGDSS*  
121 *KSGKSGSSKSGKSGKGGYHIMGKSGKSGGGGYGSGYKYDDGYAADDNYVGADDVIGE*  
181 *PSPTDDANFDDVVATTNPTGGFSIATTNPTGGFSTGATGTGSTGFGTGSTDFATGPTGTE*  
241 *FFSTGPTV*

**SiMat2** (TP-ID25898, SFLP84)

1 *MKSSILLTIVFLPLILARRDGTI SEINEDVAPAIITETFATESLVATTTDAATTDAPELV*  
61 *ELQIDEDVLRGTNKT LAPTPFPGRPTIPGTT PFPPTENTPAPSPGEGTRPSPSPYSAKPPT*  
121 *TGCSKSGKGGKSGKSGSMDYIIDCIDLSTKSGKANGGYGSSSKGGKSGGGKSGK GAYGTA*  
181 *GSGKSGKPSNGYGGYGGDNYNHDDNYS PKAQYRVFDGPFRNGAVEAAAPEDILDGQIDAE*  
241 *IQATLVQAE LDEELMRGTNKT LAPTPFPKRPTPPGTT PFPPTENTPAPSPGFGTKPPTPYS*  
301 *AKPPTTGCSKSGKGGKSGKTGSM DYVIDCIDLSTKSGKTDGYGSGGSSKGGKSSGGYGDS*  
361 *NDDTYAGVDDYVSGGKGGKSDGSSKSGKSSSTG SYDGSYGYGAREFLLEEAVMDTVMAEGT*  
421 *GFEGCNKFAVSTDWRYLFTGDNLPM*

**SiMat3** (TP-ID22349, SFLP52)

1 *MRIGTSLMAVAALPLAVAASVDGHRQLSSKSGGGG WNGGGWYHDHDSWSSSSSKSSK*  
61 *SGSSKSSKSGSSKSSKSGSSKSSKSGSSKSSKSGSSISSGDWGHGGWEGYSGKGGKSGGG*  
121 *NWGGNWHSSSSSSSNSSGKSGKESKSSSKSSKSSSKSSKSGGGYHYNPRPQWDDDGHS*  
181 *HNSPGICAPDFHSGGLDCGHDSDDVDFKYCSEPGSDGECGSGFSCYDKKLCPKYSYEGGY*  
241 *FSPEGVCDDNGKGLDCADVTTYCTE PGGHGECEGAGRQCHDAGLCGYGGKGLDDYDGVCGA*  
301 *AYGGIHGGGLDCGEVST SCTDVGSKAECAHGATCFSSGMCHESGKHAGVCGSDDGFFCDD*  
361 *VKTYCSSPGESGQCGRGKSCYDAGLCHGSGSDYSGVCAPKEGKGGLECGDVDQYCTEPGS*  
421 *QGECGEGHTCYASDICYGGDSHGASGAVCFHNGDKVSCSGNPEGDAVYVQFSYSAETSGV*  
481 *DPDDVVGPLEDKILSAVADHVSSGYGGSVTMISSDPSDYIKDDEACSTKYS GDKCSVIK*  
541 *EMTVYANGHELDACEYADIVEYSMYDKDFSNVHGVEKA EYIRAESSCNTNAIIGSGNAE*  
601 *DESLGAGAMIGLAMLAAALAAIALAARPRRKRK PATDKDFDIVSLDSNEGREFLGMGNDPF*  
661 *ASTVDVHKCTSMYCNCNKGLGGTTFI PAPKKADMNKTLEAQGIASPOGVGEAQGFFVGE*  
721 *EAVDDLEMDEEPQDNIRVNPSATEAHRSLTPVHEIAHDSEIDTEFESEGEEDMDSIPPP*  
781 *PPLPPGHMQRAGLYDREMRDDEMSI*

**SiMat4** (TP-ID25912)

1 *MKIHSFTLSAFLALVTAATTNAQVPLVGYTKFGDNVCADGQYKFSPPFSYVVTSYNGLSA*  
61 *GACAATCDTYGDSNGVMKQINSFTLAVDINQRCNFDNGSTIPESIKDDAVIRFGVDVEA*  
121 *MVNGDIGEAHCYTRDGYKEPVPTQTPTASPTIPDIKFYYPATPNLDFGPCADSQGRILPFG*  
181 *LVPFLDEPSNDARDAEICARNCFDFGSIYNNWEEQVGMGLTVDLDTDPMAVYCKCYFESNE*  
241 *NLPRITIDGFI RFPKLTGAVAGIGGQDDEEKETESTICYVREAYVASSAPSVSSRPSISP*  
301 *KPTRSPTRSPVTPRPSRSPTKSPSVSPTLAPSTSPTLSPSLSPTLSPSASPTTPTTSPTLS*  
361 *PSLSPTLSPTLSPTLSPTLSPTLYPTFSPTMSPSNNPTQAPSISPSRSPNNNVDDFFPTM*  
421 *SPTMDSVPNIGCSKSSKRGKGLRTKSGKAGRC KSGKGNRHEIDWVRPQKPWKSGSFGNKKDM*  
481 *RFVFDSDSNTDDNGLPLDIVVGPSPKPLKKS VVNATITTTVNNE DI*

FIGURE S6 (part 1).

### SiMat5 (TP-ID21757)

1 MLLIPLILRLFAITTASSSEWQHTNPSAASLR**RQL**QDDATSTTSNTTPDDGDLPFHKAT  
61 FLASHNAHANRDAASSFFETLGINQDSSIYDQLSNNDVRLGLLDIKLDPNFADEQLRLV  
121 HGPLDFGGFSSVANENLIPFLEENPNNAIVTLILETTGDSGEYEATIRANILKELQTIFFS  
181 ALSVNGQPLKEITFKYD DLLWQNHDNWPTLSEIRQSGQRLFI FSDRSELANSEYGFMHN  
241 QQVMKENYWEGVVD CIAQFGWDLSTVSLPSNQSW SRLFMNHFCESGAESFGRVVGEA  
301 LLGGGDNGWGILYPRIQNCMANNGGVT PNFIALDWVNVNSEEARAVRDYLFKGGAVGRGQ  
361 TCDDDSQCATSSCNTAAGICQCQECASNSLDICPGCASGQYCQSAGDSSANQCIVKERI  
421 ENSYVCSTSFDSAVASCNTAVRCPNGNDDCPVDQVCFNAVDCLPAPTLOPTDQSSSSSS  
481 SDATTSVQVQEI TTTVPATAETSESPSAAVIEPTAAPITPASRYCGESYEDAKTTCSEI  
541 TACPKGYECP SGLTCYDGVKCFTRRPTSSPTDPTTASPISPSPASPVTDAPIAPSMSP  
601 TDRPTRAPFDFFNEYFCGGNFTEAQSSCYTTTPCPTGSPASCLNGETCYGGIKCIAPPS  
661 ISPTLOPTDKPPTKSPSAVVQEQTTSPPFNWLNTNGGMAAMSGGYAIVAMIVGVAGVML  
721 W

### SiMat6 (TP-ID24761)

1 MPMKVLLALLLIIVEAASVSANTLRGSEESK**REL**YGGTNRSGGYGYRHPYRFIGRRGGC  
61 KPDLYLVEDDSERSTKKCTDNL RDEFWREVNSVKT VHTAIGARYGDLIYYVNOATNCGDV  
121 WIEIDEDIRLHRGRIRCYRHSYGYD GSSKSSSSSQDNDNDSTSSSEDNDNDSTSSSEDNDND  
181 STSSSEDNDD

### SiMat7 (TP-ID24710)

1 MKFVLPAILLATATANPFAPKQTRNTKKAAYAASLMRGATPL**RRL**EDAYDGQVDVDLSGY  
61 SVKFEKCFVKQYEGGEGG**NNNKN**GNGEQFLSTKR FVIFRLCPDSSCSCSNYNYGEYIV  
121 DMDTYLESTLQYKQEEQETYCQSCQOCVEMQA**NANNGDANDDQNNDNAWMCNN**IDTSTCY  
181 DECQNIENMEANGYMDASELTGCVKMNYQDNYGNAYYAGAMCASSGTRIKIGVFSDEQCS  
241 QVVEDADIETYLAYG**NNNDNNN**GVTM KLSYHLLKQTFPESGCVSSCLKQ**NENQNNNNNNN**  
301 GEQQA AEVNEICENLYEVAGKCESTHGFKTGYANYDNYENQIRNEELVCDFISSVSAGHY  
361 DQTGEIVVSGGR TTLGGGVATTGGQKFAL TFFILGSVGLAGYAAMLHQQLTKGAKADLSR  
421 QGGAMA

**FIGURE S6 (part 2).** Amino acid sequences of SiMat proteins. Regions rich in both lysine and serine are shown in red. Tyrosine-rich regions are shown in green, tryptophan rich regions in blue, and regions rich in both tryptophan and tyrosine are shown in purple. Asparagine-rich regions are depicted in orange. KXXX motifs are highlighted in yellow, and RXL motifs are shown in white letters on a black background.

### 5'-end of SiMat1

```
1 GGGGGGGGGG GGT TATTTGC AAATCGCAGC ATTACACACA ATCACAATTG ATACACAATC
61 ACACGCTACA CCTCCACCTC TTTGTTCTCT GTTCTCTGTC ATCGTTCAAC GTCAATCTGT
121 AATCATGAAG CTCTCAAAGT TTACTACCGT CGCCACAGCT CTCGCTGCTG CCTCTCCAG
181 GCACCGTTGG TATCTTCTA
```

### 3'-end of SiMat1

```
1 TACCGGTGGT TTCTCCACCA GTGCTACTGA GACGGGAAGT ACTGGCTTCGG AACGGGAAG
61 CACCGACTTC GCCACTGGCC CTGCTGGAAC CGAGTTCTTT TCTACTGGTCC TACCGTTA
121 GAGAGGATGT TGTACTACAG TCACAATCTT TAGAGATACC TGCCATGAGGT AGTTGTCAG
181 ATACTTTGAT CCTCGAGAGA TCAATTCCTT AGAGATGTTT GCAAGCTGAGT TCTATATGC
241 ACCGGACGGA AGCGCATCAT CTATTAGTTA CAGTTACTAC ATTGATATTGC TGTATTCTC
301 TCATGAGAAA AGAGAGAGTC TTAAACCTCG TCACGAAAAA TGCCTTTCAAA GAAGAAAGA
361 TTCAAGACAA TTATGAAGCA GCAACGATTA CATAACCACT AAAGTAGATTC TTAGATTAG
421 TTGAAAAAAAA AAAAAAAAAA AA
```

**Figure S7.** DNA sequences obtained from 5'- and 3'-RACE PCR for the SiMat1 cDNA. Start and stop codons are highlighted in red, polyG- and polyA-tails are underlined.

## TABLES

**TABLE S1.** Amino acid composition of the insoluble organic matrices. The analysis was performed three times from independent isolates of the insoluble organic matrices. Standard deviations are provided. ‘Trace’ indicates detectable levels of an amino acids with a relative abundance <1.0 mol-%. Hyp = hydroxyproline, Dihyp = dihydroxyproline.

|                             | Amino Acid       | mol-%     |
|-----------------------------|------------------|-----------|
| <b>Non-polar</b>            | Ala              | 3.7 ±0.4  |
|                             | Gly              | 27.7 ±3.4 |
|                             | Ile              | 1.7 ±0.3  |
|                             | Leu              | 1.9 ±0.3  |
|                             | Met              | trace     |
|                             | Phe              | 2.4 ±1.9  |
|                             | Pro              | 1.9 ±1.4  |
|                             | Trp              | trace     |
|                             | Val              | 2.0 ±1.1  |
| <b>Polar,<br/>uncharged</b> | Cys              | trace     |
|                             | Ser <sup>+</sup> | 25.0 ±1.4 |
|                             | Thr <sup>+</sup> | 3.2 ±1.4  |
|                             | Tyr              | 10.6 ±2.8 |
|                             | Dihyp            | 2.3 ±0.6  |
|                             | Hyp              | trace     |
| <b>Cationic</b>             | Arg              | trace     |
|                             | His              | 1.1 ±0.1  |
|                             | Lys <sup>§</sup> | trace     |
| <b>Anionic</b>              | Asx              | 10.3 ±0.4 |
|                             | Glx              | 2.7 ±1.5  |

<sup>+</sup>includes O-phosphorylated derivatives

<sup>§</sup>does not include modified lysines



**TABLE S2.** Monosaccharide composition of the insoluble organic matrices. ‘Trace’ indicates detected amino acid with a relative abundance <1.0 mol-%.

|                     | <b>Monosaccharide</b> | <b>mol-%</b> |
|---------------------|-----------------------|--------------|
| <b>Hexoses</b>      | Fructose              | trace        |
|                     | Galactose             | 9            |
|                     | Mannose               | 23           |
| <b>Pentoses</b>     | Ribose                | trace        |
|                     | Xylose                | 20           |
| <b>Deoxyhexoses</b> | Fucose                | 3            |
|                     | Rhamnose              | 2            |
| <b>Aminosugars</b>  | Galactosamine         | trace        |
|                     | Glucosamine           | 14           |
| <b>Uronic acids</b> | Galacturonic acid     | 6            |
|                     | Glucuronic acid       | 14           |
|                     | Mannuronic acid       | 7            |

**TABLE S3.** Proteins identified by proteomics analysis of the HF extract from the insoluble organic matrices (see corresponding file: **TableS3.xls**).

## REFERENCES

1. Poulsen, N., and Kröger, N. (2004) Silica morphogenesis by alternative processing of ailaffins in the diatom *Thalassiosira pseudonana*. *J. Biol. Chem.* **279**, 42993–42999
2. Schägger, H., and von Jagow, G. (1987) Tricine-sodium dodecyl sulfate-polyacrylamide gel electrophoresis for the separation of proteins in the range from 1 to 100 kDa. *Anal. Biochem.* **166**, 368–379
